# Supplementary material
Source: publisher figshare collection journal article supplement (https://acs.figshare.com/ndownloader/files/4776163)

## Supporting Information

### 1. AFM Images of Channel Accelerating Voltage Dosage Study

**Figure S1.** AFM images of channels patterned on L-PDMS with constant 30 kV accelerating voltage. The exposure dosages range from 201  $\mu\text{C}/\text{cm}^2$  in the upper left to 2010  $\mu\text{C}/\text{cm}^2$  in the lower right. At low dosages a raised line is patterned, and increasing the dosage allows for fabrication of recessed channels.

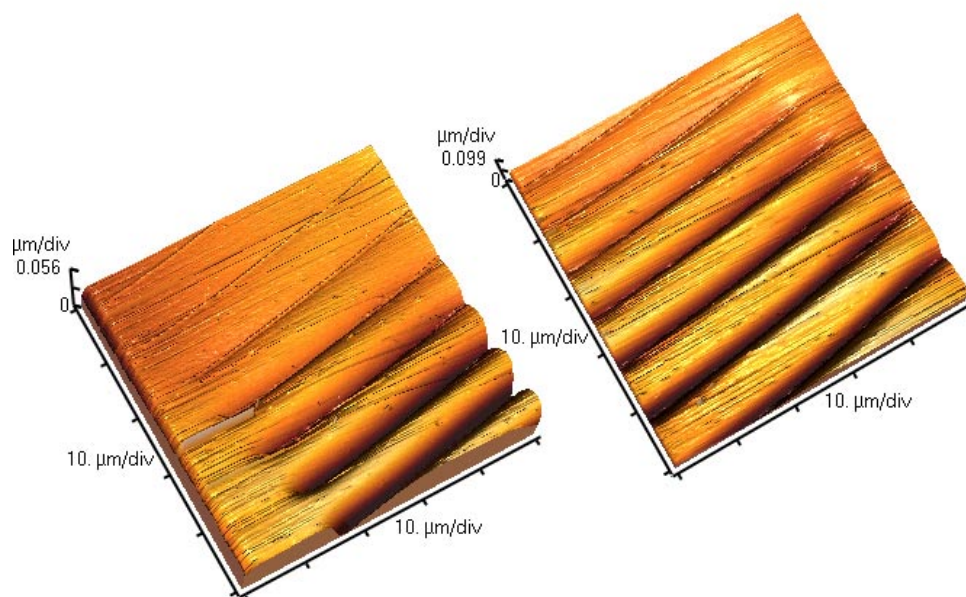

**Figure S2.** AFM images of channels patterned on L-PDMS with 15 kV (a) and 30 kV (b) accelerating voltages. The exposure dosage was held constant at 2010  $\mu\text{C}/\text{cm}^2$ . (c) Channels patterned at 15 kV are narrower and shallower than the channels patterned at 30 kV.

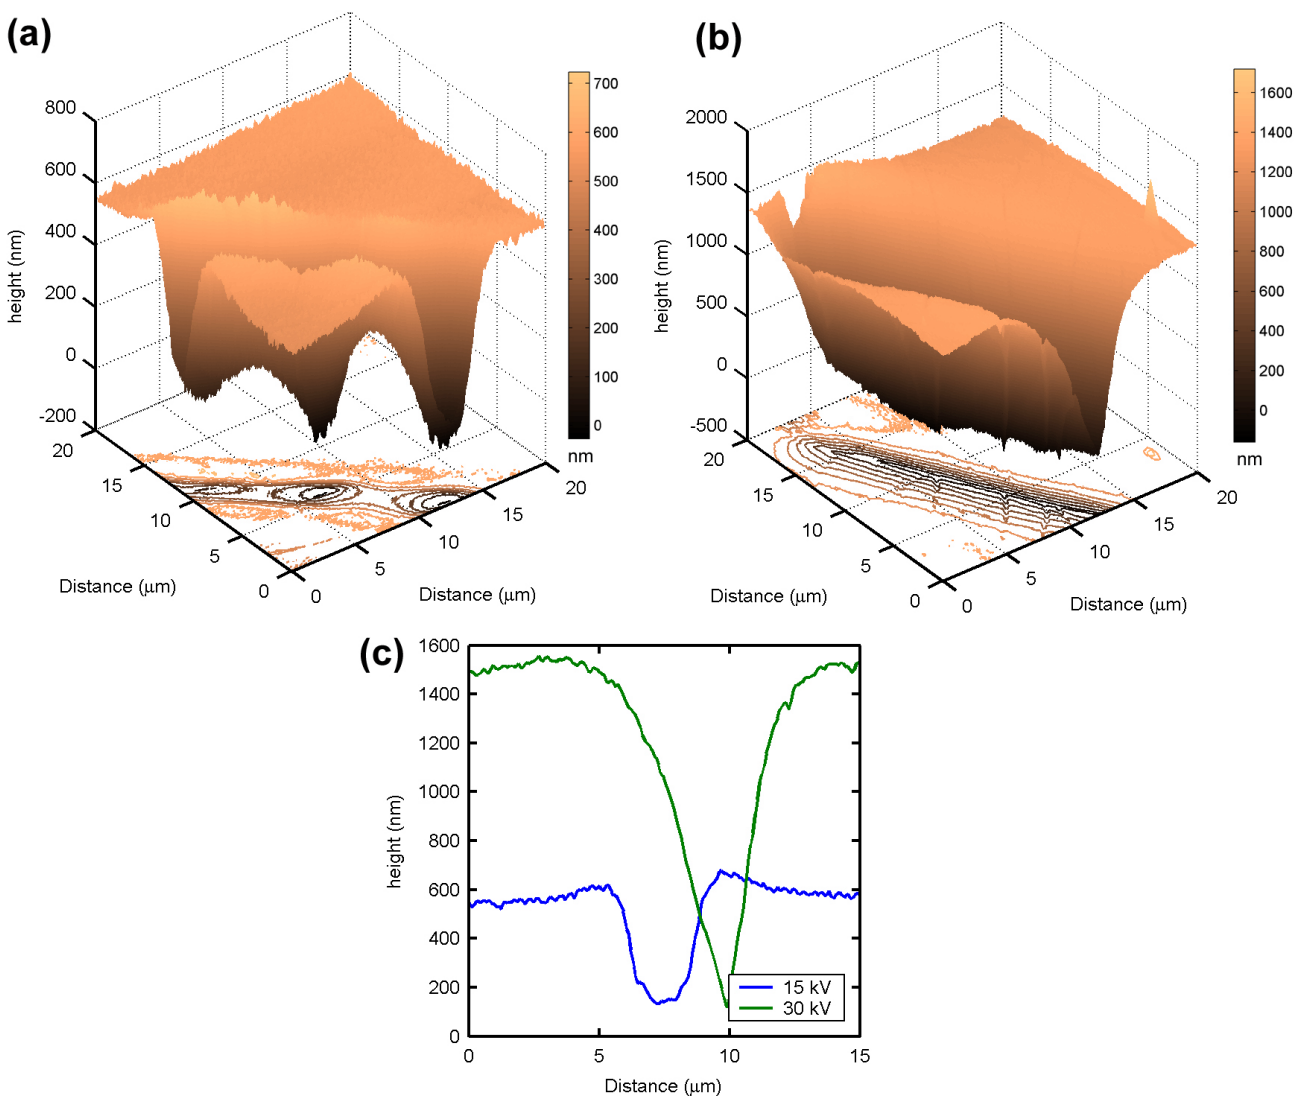

## 2. Complete ToF-SIMS Spectra of L-PDMS Without Au Coating

**Figure S3.** Complete ToF-SIMS spatial distribution maps for patterned L-PDMS *without* Au coating. The patterned feature is circled in (l). (a-h) are known PDMS fragments and (i-k) correspond to unknown fragments. The scale bar is 10  $\mu\text{m}$ .

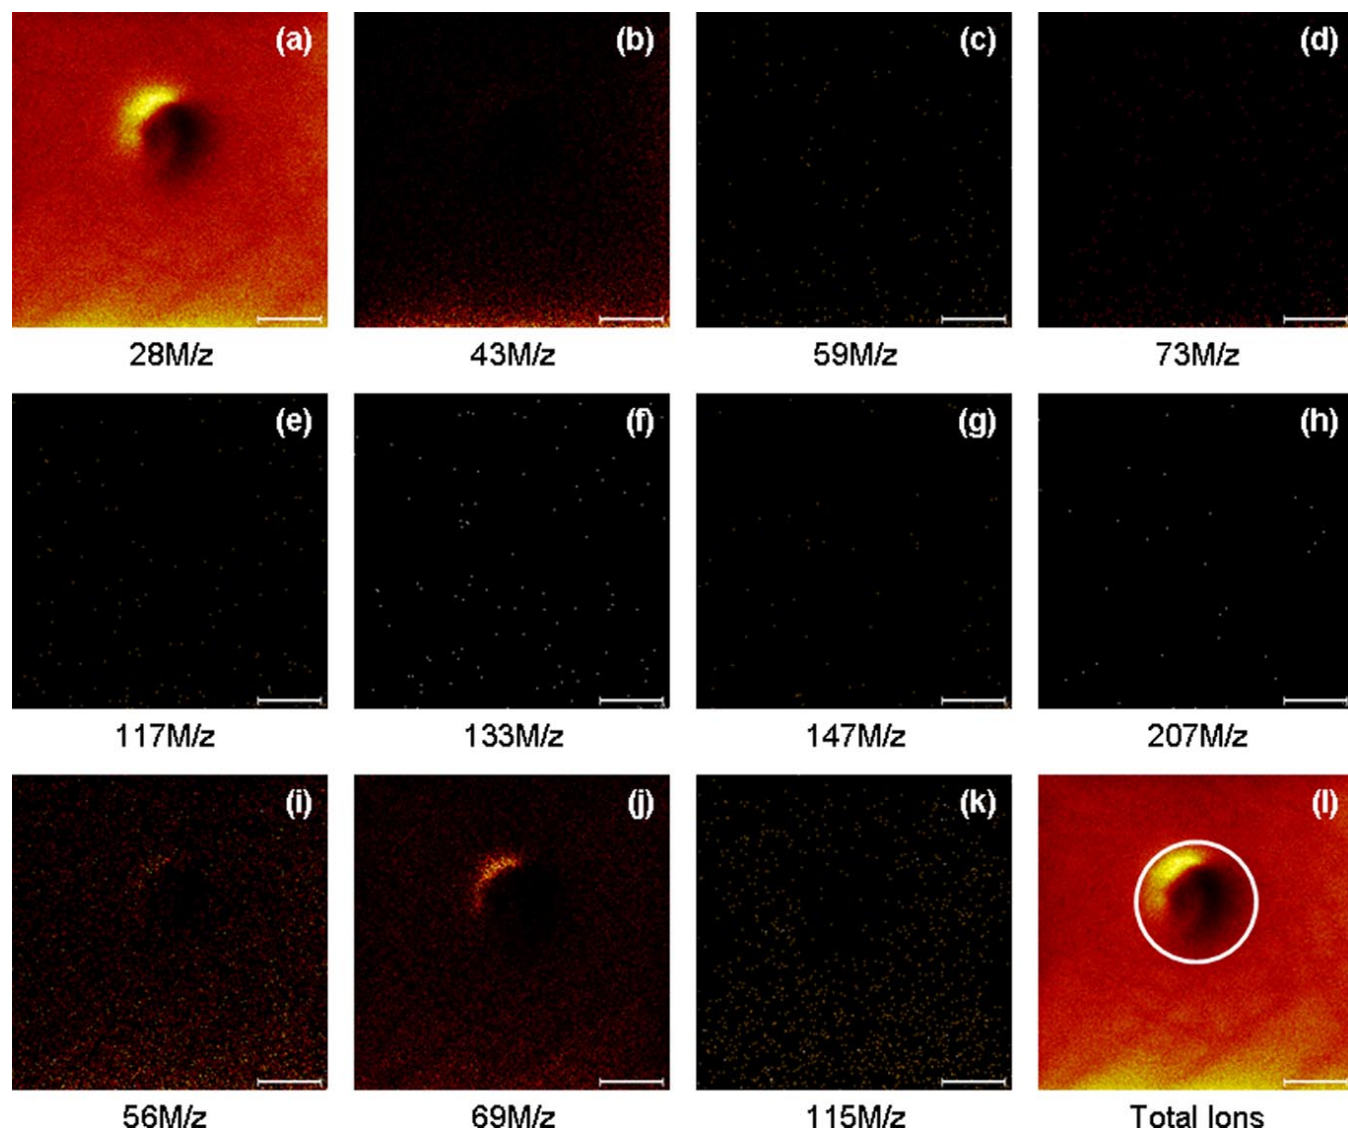

### 3. Complete ToF-SIMS Spectra of L-PDMS With Au Coating: PDMS Peaks

**Figure S4.** Complete ToF-SIMS spatial distribution maps for patterned (5  $\mu\text{m}$  x 5  $\mu\text{m}$  boxes) L-PDMS *with* Au coating. The patterned features are circled in **(p)**. **(a-o)** are all known PDMS fragments. The scale bar is 100  $\mu\text{m}$ .



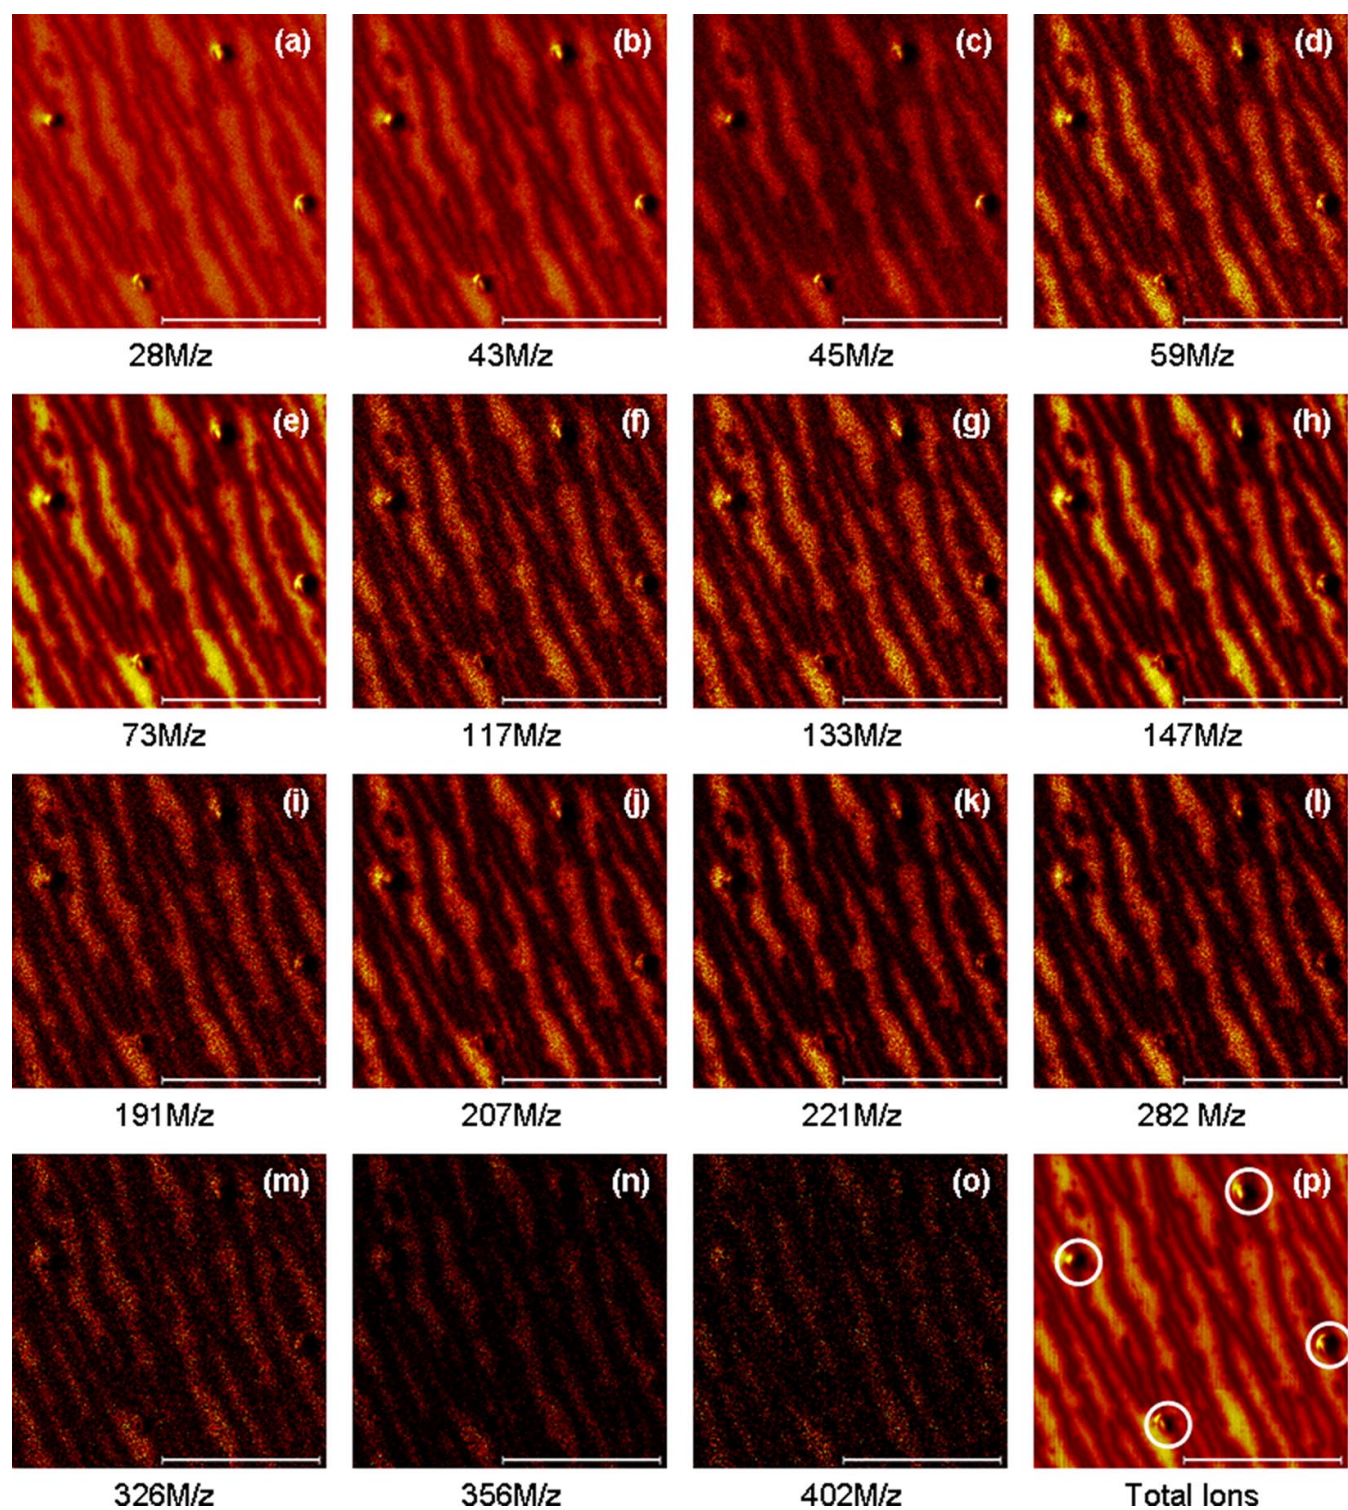

#### 4. Complete ToF-SIMS Spectra of SAM-Coated L-PDMS Reacted With APTS

**Figure S5.** Complete ToF-SIMS spatial distribution maps for patterned ( $5\ \mu\text{m} \times 5\ \mu\text{m}$  boxes) SAM-coated L-PDMS reacted with APTS. The patterned features are circled in (p). (b, d, e, g, i, j, l, m, n, o) are known PDMS fragments and (a, c, f, k) are known SAM fragments. No APTS



fragments were detected. The peak at 69 (**h**) could be due to the  $\text{CF}_3^+$  or  $^{69}\text{Ga}^+$  ion. The scale bar is 100  $\mu\text{m}$ .

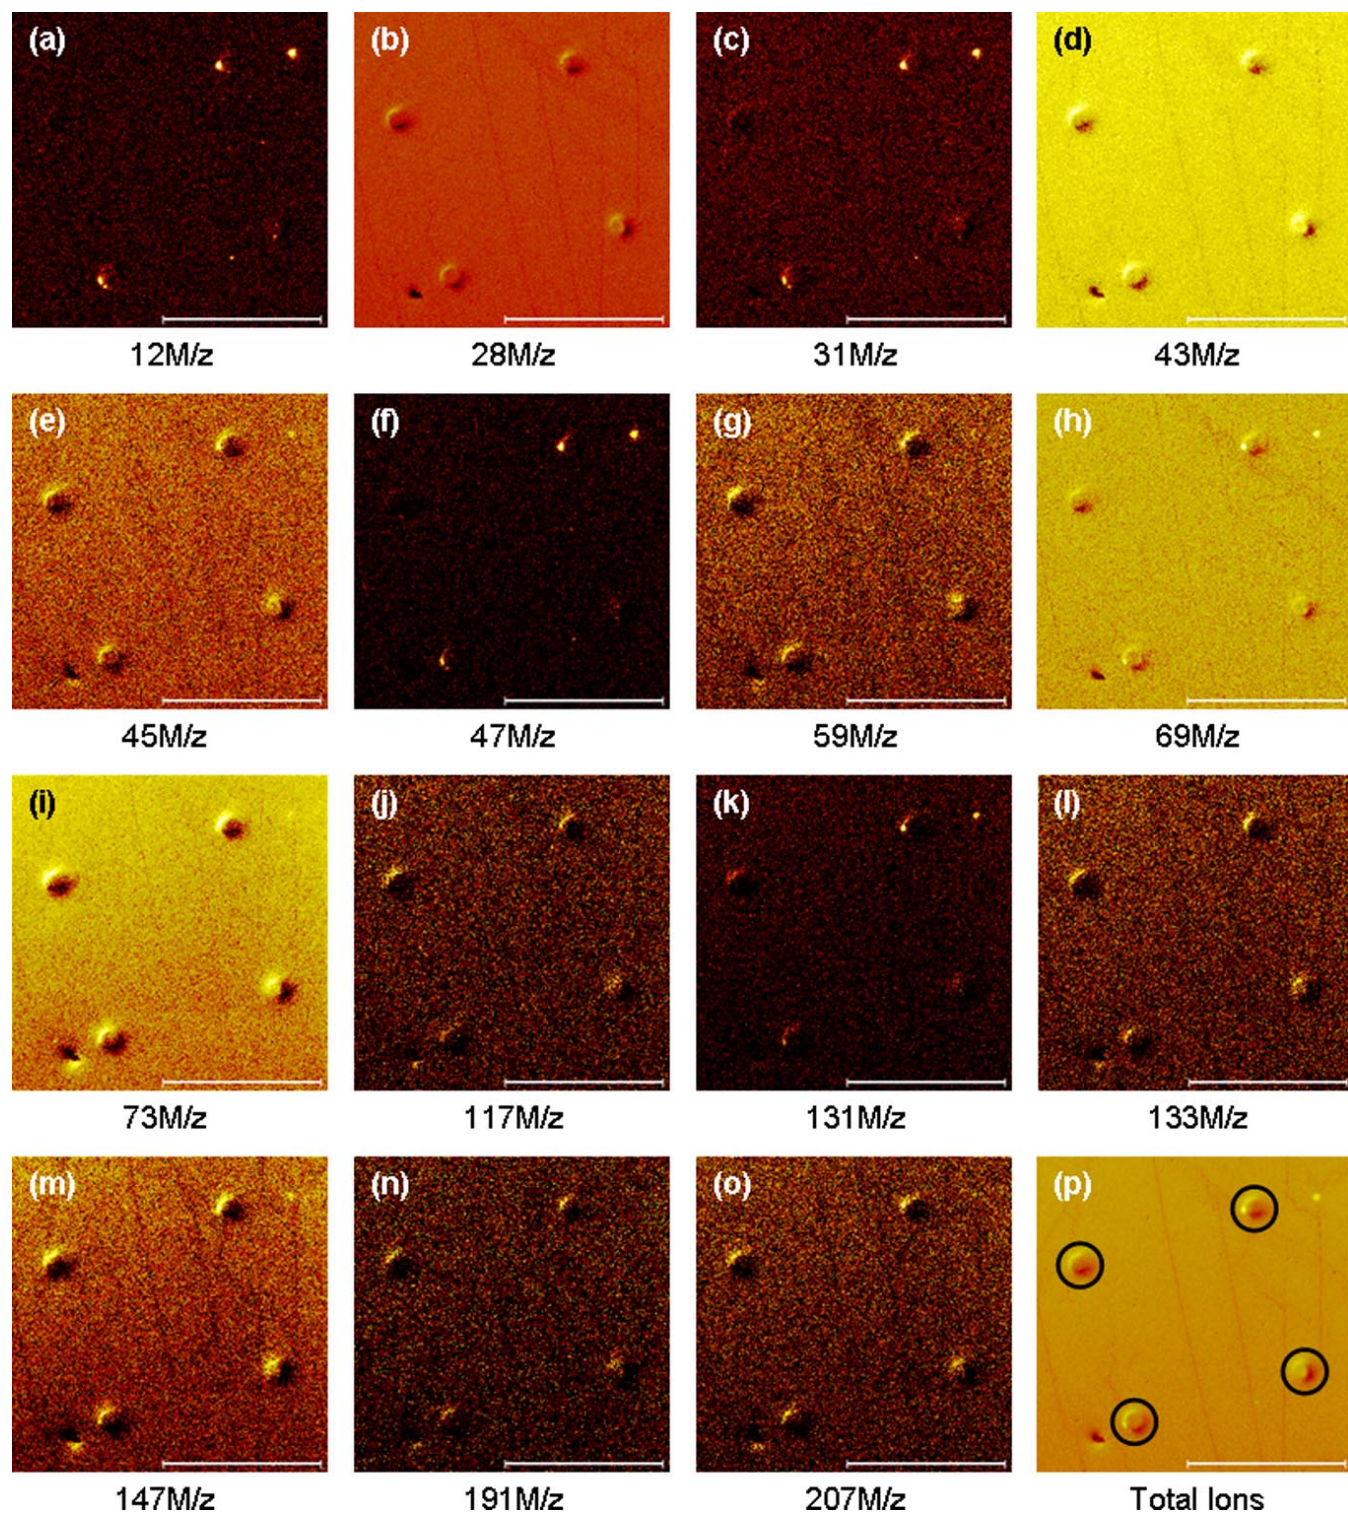

## 5. Optical Images of Soft-Contact Optical Lithography Study

**Figure S6.** Optical images of patterned photoresist at varying exposures. The L-PDMS stamp is shown in the lower right image. The pattern written into the L-PDMS stamp by EBL is a string of five circles lying on a line. The scale bar is 25  $\mu\text{m}$ .

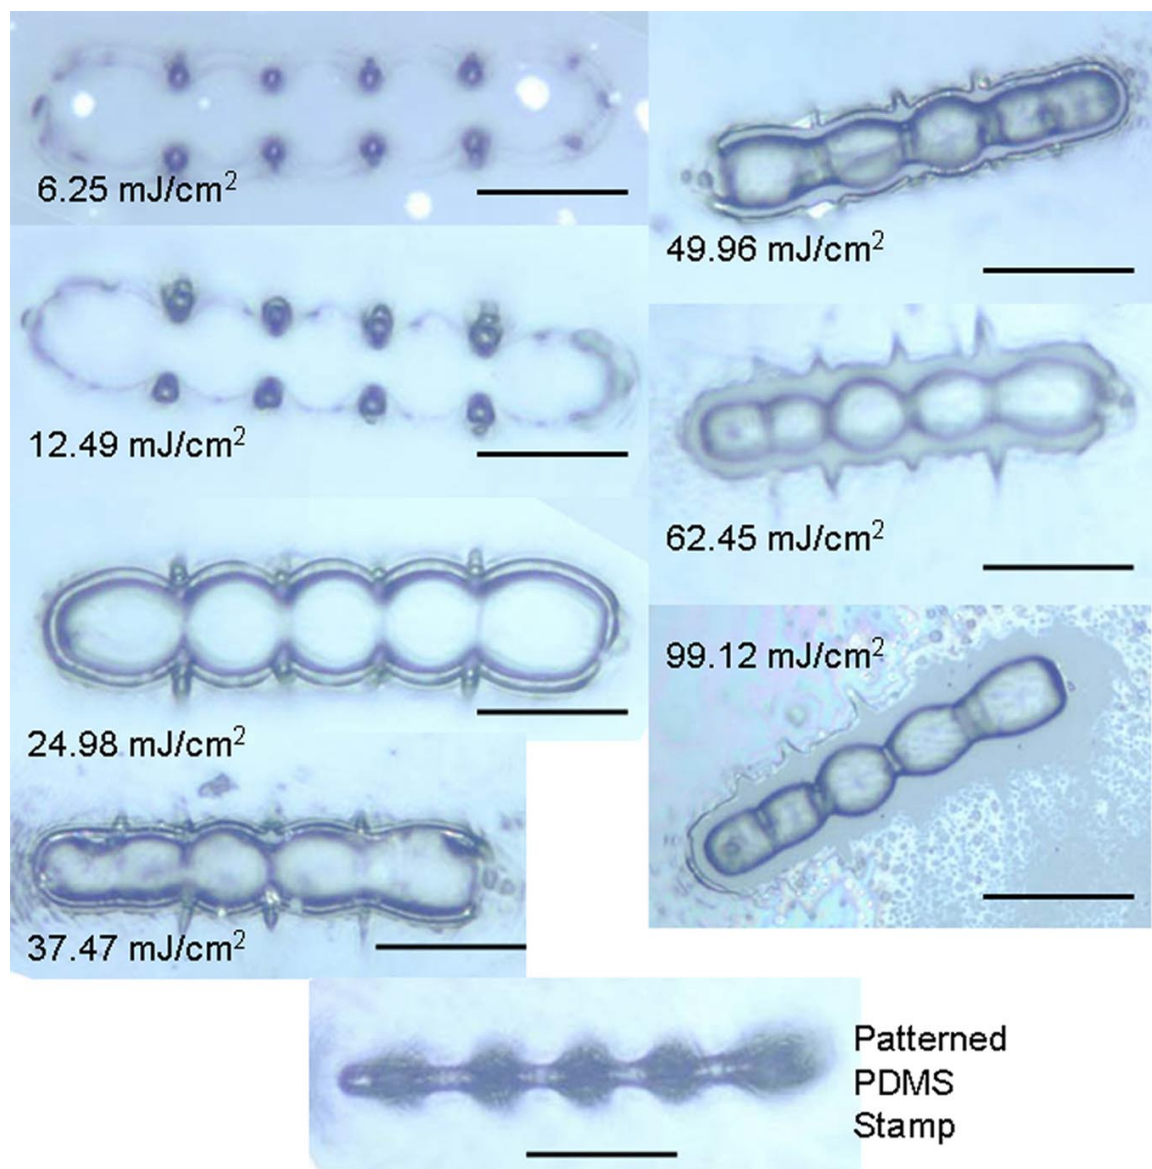



**Figure S7.** AFM images of patterned photoresist with various exposures and stamp channel dimensions. The exposure listed in  $\text{mJ}/\text{cm}^2$  is the photolithographic exposure, while the number listed in  $\mu\text{C}/\text{cm}^2$  is the EBL exposure dosage used to pattern the stamp. The pattern written into the L-PDMS stamp by EBL is a series of evenly spaced lines.

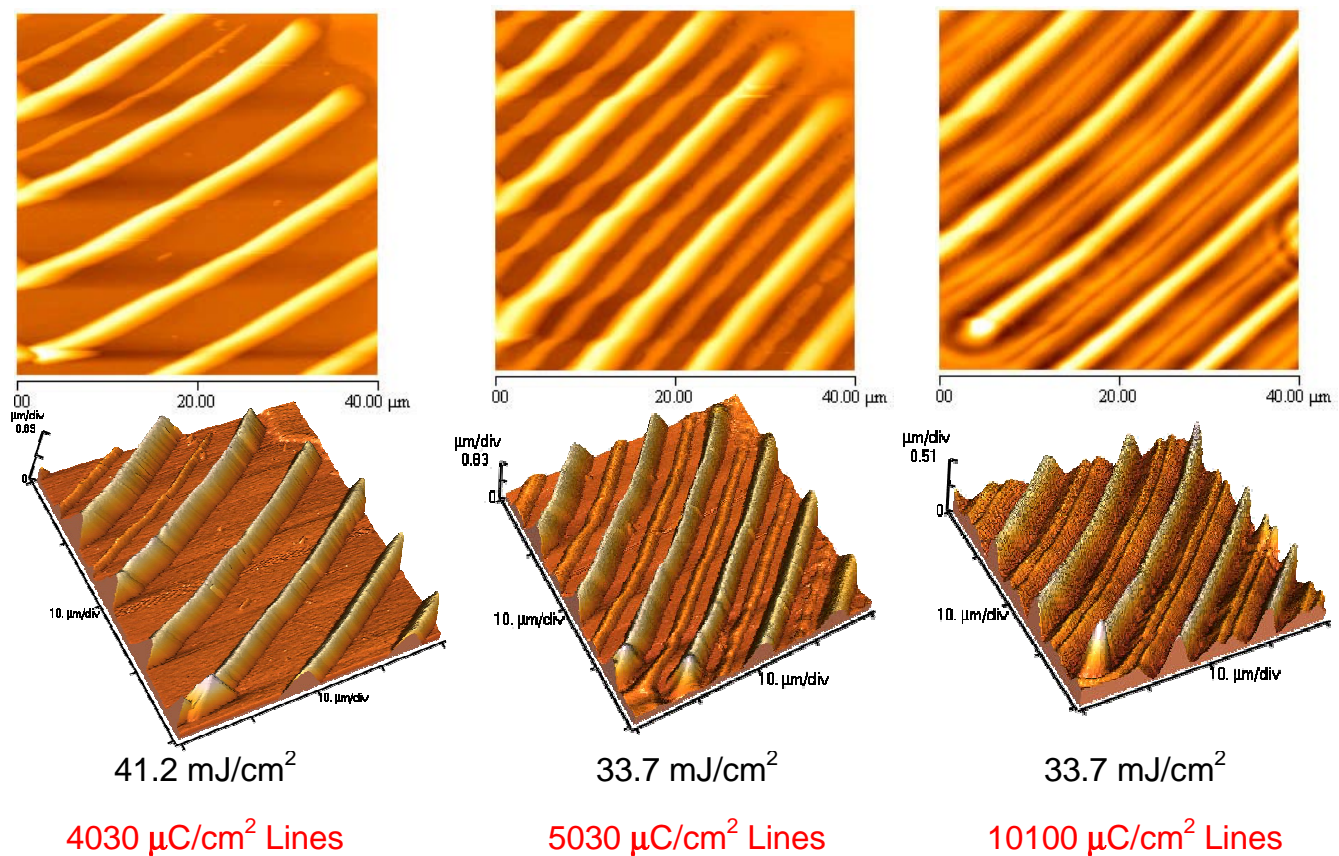



## 6. Additional ToF-SIMS Spectra of SAM-Coated L-PDMS

**Figure S8.** L-PDMS ToF-SIMS spectra subtracted from the SAM-coated L-PDMS ToF-SIMS spectra.

The peaks on the top half are unique to L-PDMS, while the peaks on the bottom half are unique to SAM-coated L-PDMS. The peak at 69 could be due to the  $\text{CF}_3^+$  or  $^{69}\text{Ga}^+$  ion.

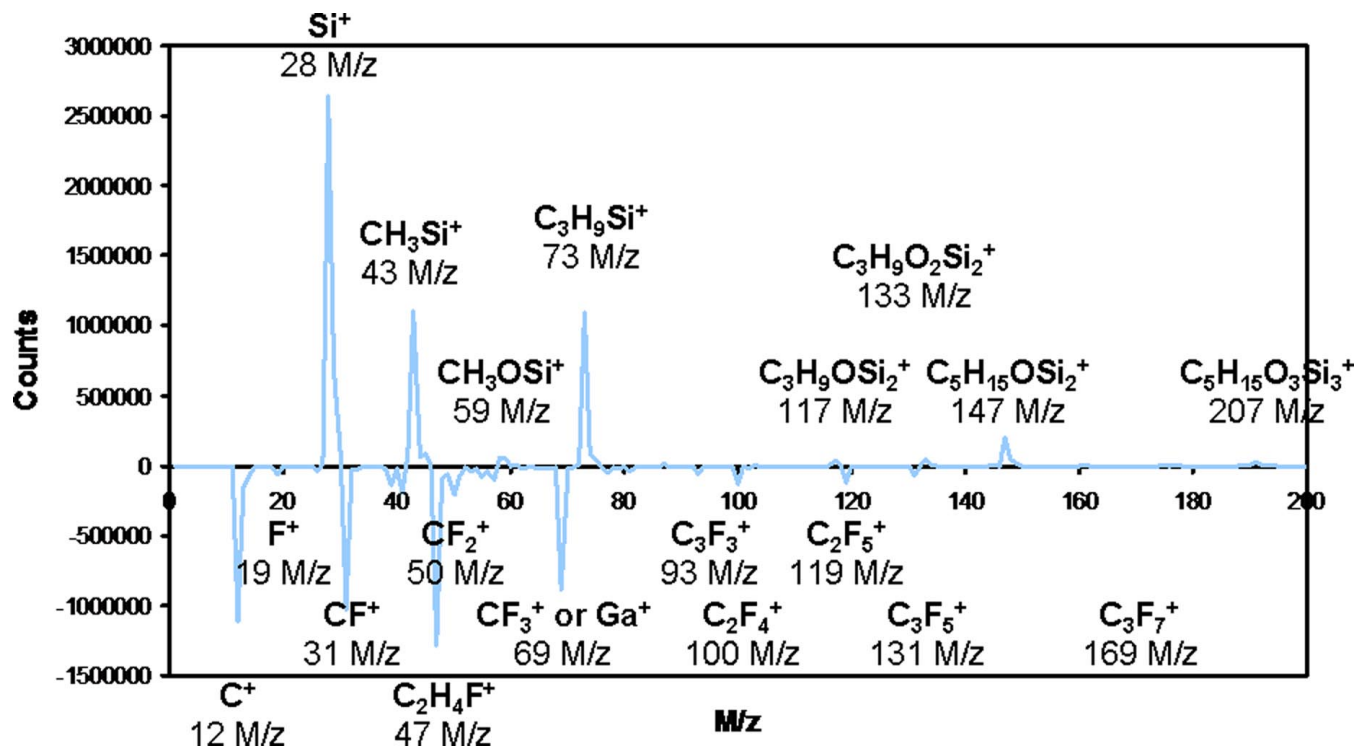

## 7. TGA's of L-PDMS and H-PDMS

**Figure S9.** L-PDMS TGA.

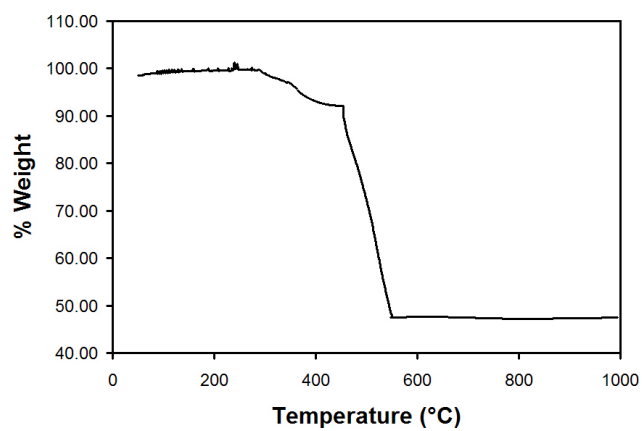

**Figure S10.** H-PDMS TGA.

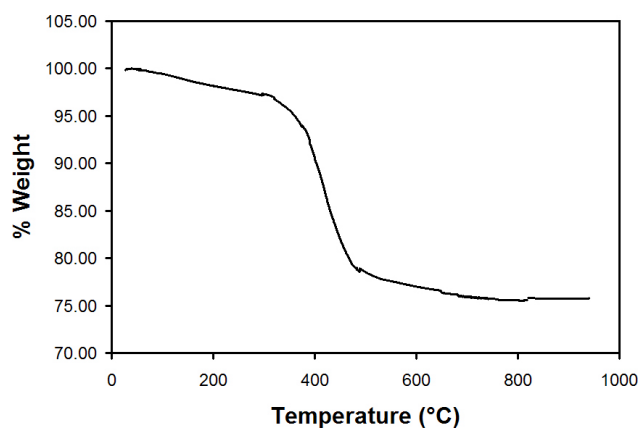



## 8. AFM Line Scans for Time-Resolved Study

**Figure S11.** AFM scans (a) immediately after EBL patterning and (b) 250 hours later. (c) Line scans reveal that some changes do occur over time.

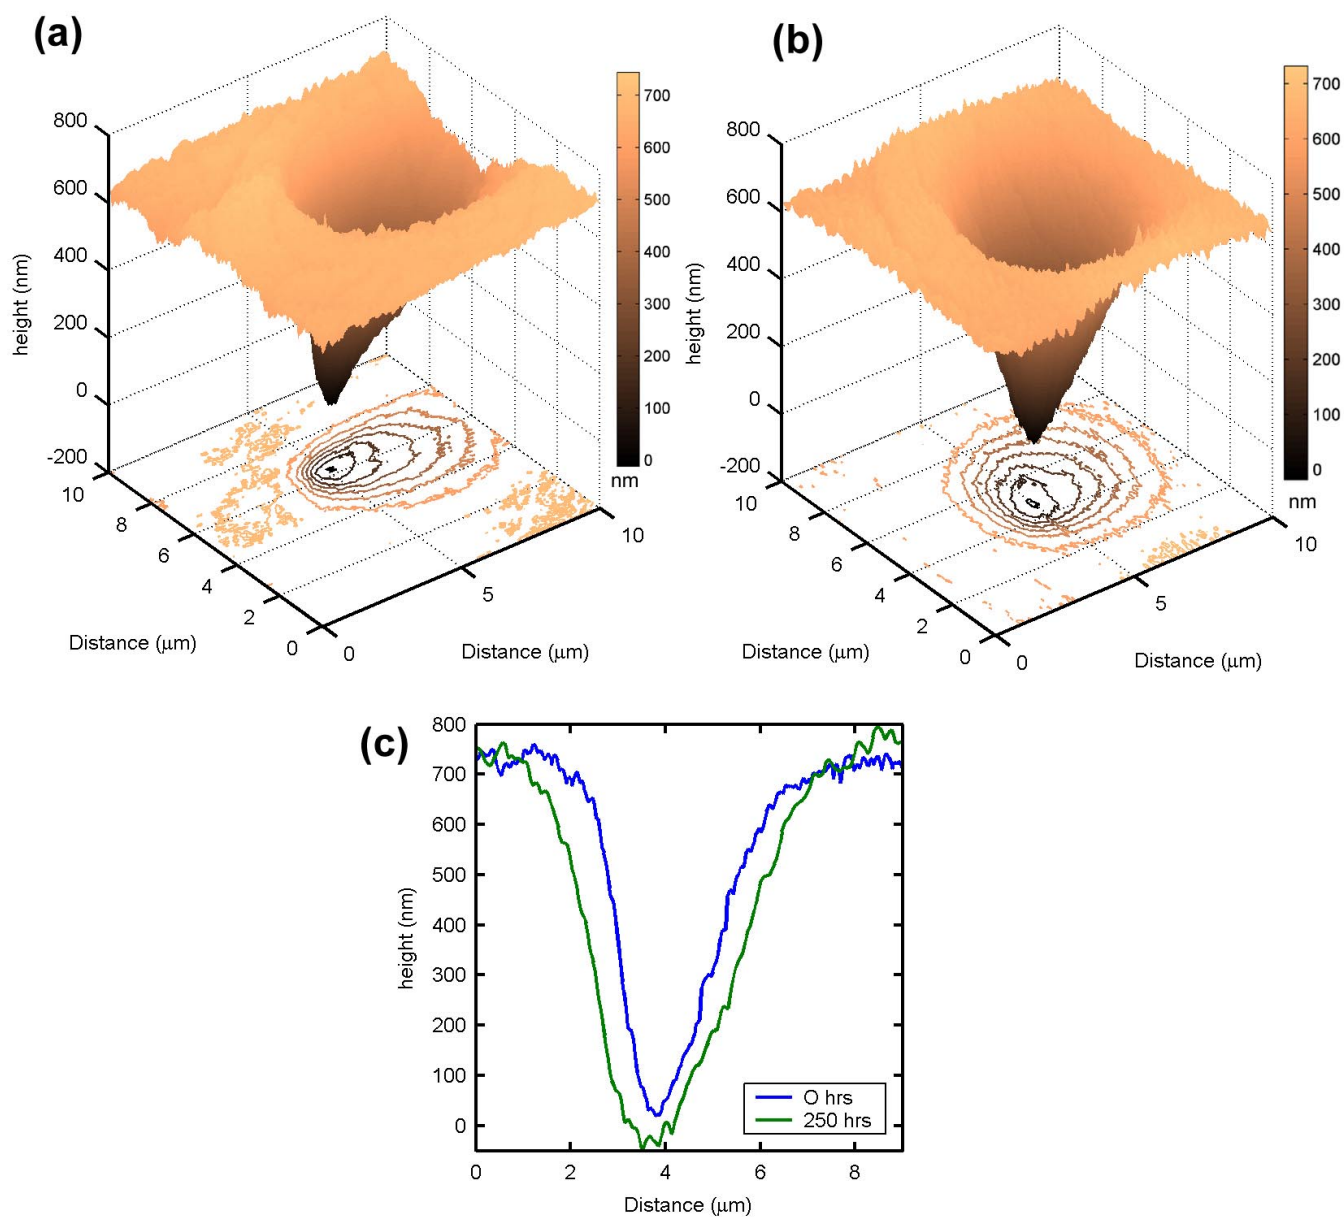

Supplement: Supplementary file 1 [file 4776163]
